# Supplementary material
Source: publisher figshare collection journal article supplement (https://tandf.figshare.com/articles/dataset/_/9944129)
Supplement: Supplementary file 1 [file 2]

Journal of Vertebrate Paleontology

A new species of baenid turtle, *Saxochelys gilberti*, and evidence of spatial niche partitioning within the most speciose group of testudines (Baenidae) from the latest Cretaceous (Maastrichtian) Hell Creek Formation

TYLER R. LYSON,<sup>\*,1</sup> JACOB L. SAYLER,<sup>2</sup> and WALTER G. JOYCE<sup>3</sup>

SUPPLEMENTARY DATA

S1: STRICT CONSENSUS OF 25000 TREES (0 TAXA EXCLUDED) RETRIEVED FROM ANALYSIS 1.

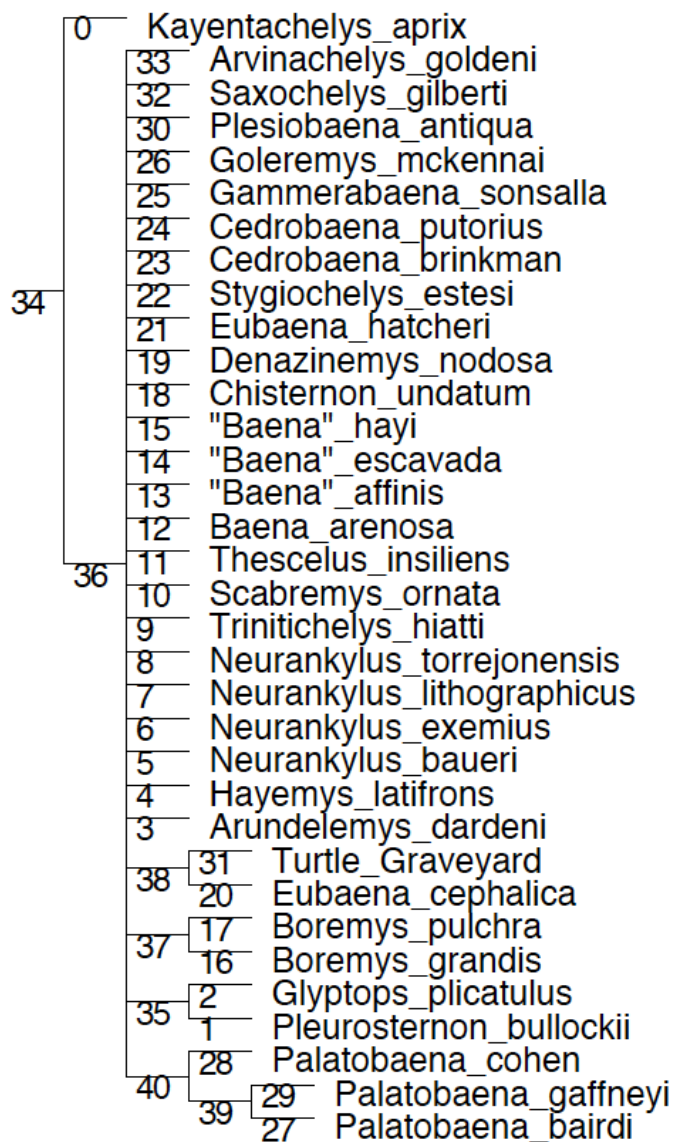

S2: STRICT CONSENSUS OF 4 TREES (7 TAXA EXCLUDED) RETRIEVED FROM ANALYSIS 2.

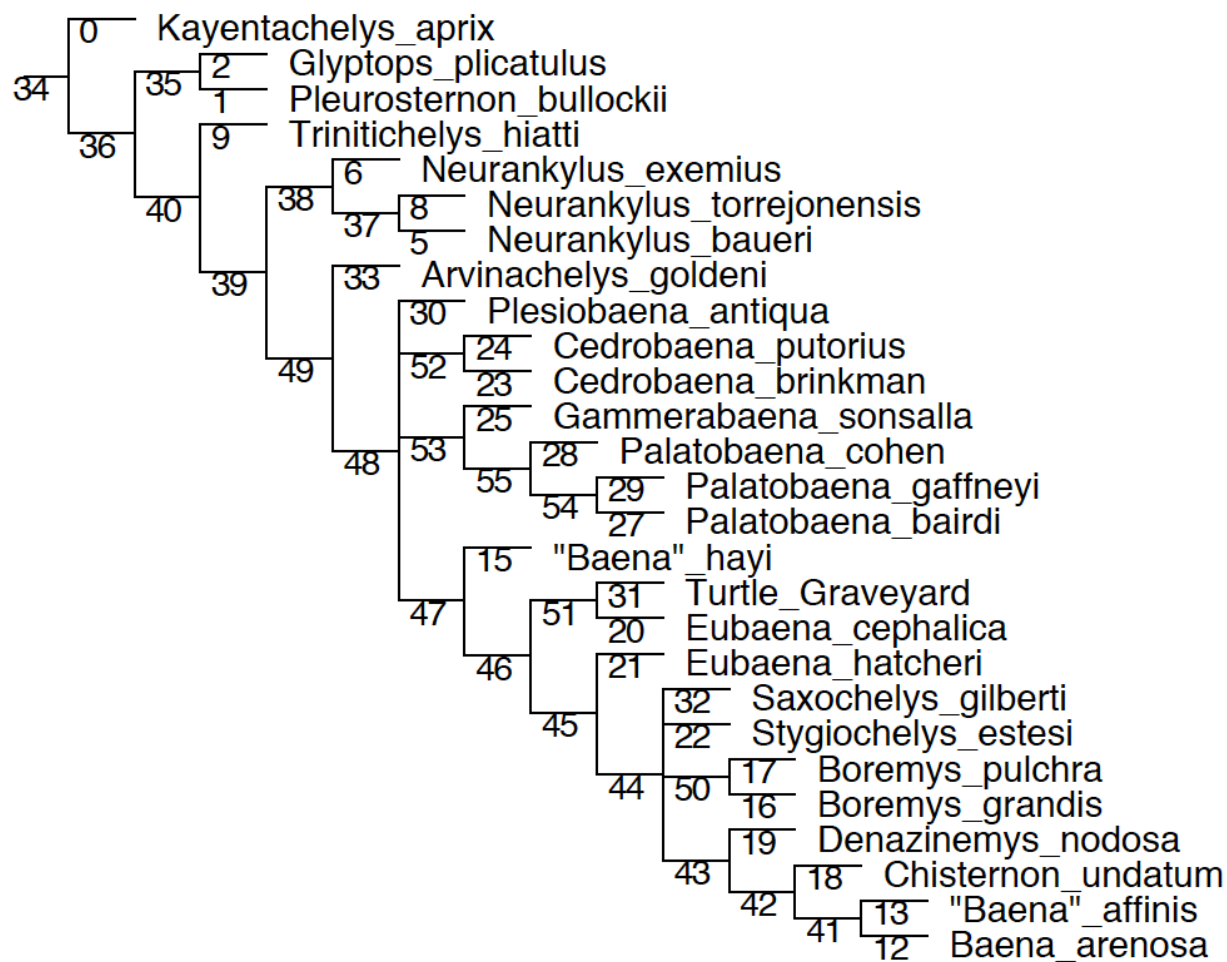

S3: SYNAPOMORPHIES COMMON TO 4 TREES. NODE NUMBERS REFER TO NODES IN CONSENSUS.

KAYENTACHELYS\_APRIX :

ALL TREES:

NO AUTAPOMORPHIES:

PLEUROSTERNON\_BULLOCKII :

ALL TREES:

NO AUTAPOMORPHIES:

GLYPTOPS\_PLICATULUS :

ALL TREES:

CHAR. 15: 0 --> 1

CHAR. 47: 0 --> 1

NEURANKYLUS\_BAUERI :

ALL TREES:

NO AUTAPOMORPHIES:

NEURANKYLUS\_EXEMIUS :

ALL TREES:

NO AUTAPOMORPHIES:

NEURANKYLUS\_TORREJONENSIS :

ALL TREES:

CHAR. 41: 0 --> 1

TRINITICHELYS\_HIATTI :

ALL TREES:

CHAR. 21: 0 --> 1

BAENA\_ARENOSA :

ALL TREES:

CHAR. 41: 0 --> 1

CHAR. 63: 0 --> 1

"BAENA"\_AFFINIS :

ALL TREES:

CHAR. 40: 0 --> 3

"BAENA"\_HAYI :

ALL TREES:

CHAR. 63: 0 --> 1

## BOREMYS\_GRANDIS :

ALL TREES:

CHAR. 39: 0 --&gt; 1

## BOREMYS\_PULCHRA :

ALL TREES:

CHAR. 54: 1 --&gt; 0

CHAR. 59: 0 --&gt; 1

## CHISTERNON\_UNDATUM :

ALL TREES:

CHAR. 4: 0 --&gt; 1

CHAR. 5: 1 --&gt; 2

CHAR. 39: 0 --&gt; 1

CHAR. 45: 0 --&gt; 1

## DENAIZINEMYS\_NODOSA :

ALL TREES:

CHAR. 6: 1 --&gt; 0

CHAR. 18: 0 --&gt; 1

CHAR. 20: 1 --&gt; 0

CHAR. 41: 0 --&gt; 1

CHAR. 42: 0 --&gt; 1

## EUBAENA\_CEPHALICA :

ALL TREES:

CHAR. 5: 1 --&gt; 0

CHAR. 6: 1 --&gt; 2

## EUBAENA\_HATCHERI :

ALL TREES:

NO AUTAPOMORPHIES:

## STYGIOCHELYS\_ESTESI :

ALL TREES:

CHAR. 32: 0 --&gt; 1

CHAR. 34: 0 --&gt; 1

SOME TREES:

CHAR. 4: 0 --&gt; 1

CHAR. 5: 1 --&gt; 2

## CEDROBAENA\_BRINKMAN :

ALL TREES:

NO AUTAPOMORPHIES:

## CEDROBAENA\_PUTORIUS :

ALL TREES:

CHAR. 7: 0 --> 1

CHAR. 28: 0 --> 1

SOME TREES:

CHAR. 29: 1 --> 0

GAMMERABAENA\_SONSALLA :

SOME TREES:

CHAR. 23: 1 --> 2

PALATOBAENA\_BAIRDI :

ALL TREES:

CHAR. 23: 1 --> 0

PALATOBAENA\_COHEN :

ALL TREES:

NO AUTAPOMORPHIES:

PALATOBAENA\_GAFFNEYI :

ALL TREES:

CHAR. 32: 0 --> 1

PLESIOBAENA\_ANTIQUA :

ALL TREES:

CHAR. 11: 2 --> 1

CHAR. 32: 0 --> 1

CHAR. 41: 1 --> 0

CHAR. 55: 0 --> 1

SOME TREES:

CHAR. 23: 1 --> 2

CHAR. 43: 12 --> 0

CHAR. 44: 0 --> 1

TURTLE\_GRAVEYARD :

ALL TREES:

CHAR. 6: 1 --> 0

SAXOCHELYS\_GILBERTI :

SOME TREES:

CHAR. 4: 0 --> 1

CHAR. 5: 1 --> 2

CHAR. 23: 1 --> 2

ARVINACHELYS\_GOLDENI :

ALL TREES:

CHAR. 5: 1 --> 0

CHAR. 7: 0 --> 1  
 CHAR. 26: 0 --> 1  
 CHAR. 32: 0 --> 1

NODE 35 :

ALL TREES:

CHAR. 0: 1 --> 2  
 CHAR. 2: 0 --> 1  
 CHAR. 13: 0 --> 1  
 CHAR. 14: 1 --> 2  
 CHAR. 23: 1 --> 2  
 CHAR. 60: 0 --> 1

NODE 36 :

ALL TREES:

NO SYNAPOMORPHIES

NODE 37 :

ALL TREES:

CHAR. 57: 0 --> 1

NODE 38 :

ALL TREES:

CHAR. 27: 0 --> 1  
 CHAR. 28: 0 --> 1  
 CHAR. 39: 0 --> 1  
 CHAR. 49: 0 --> 1

NODE 39 :

ALL TREES:

CHAR. 67: 0 --> 1

NODE 40 :

ALL TREES:

CHAR. 33: 0 --> 1  
 CHAR. 58: 0 --> 1  
 CHAR. 65: 0 --> 1  
 CHAR. 66: 0 --> 1

NODE 41 :

ALL TREES:

CHAR. 50: 1 --> 0

NODE 42 :

ALL TREES:

CHAR. 10: 2 --> 1

CHAR. 27: 0 --> 1  
 CHAR. 43: 2 --> 1  
 CHAR. 64: 0 --> 1

NODE 43 :  
 ALL TREES:  
 CHAR. 23: 1 --> 0  
 CHAR. 25: 1 --> 0

NODE 44 :  
 ALL TREES:  
 CHAR. 55: 01 --> 2

NODE 45 :  
 ALL TREES:  
 CHAR. 41: 1 --> 0  
 CHAR. 50: 0 --> 1  
 CHAR. 59: 1 --> 0  
 CHAR. 64: 1 --> 0

NODE 46 :  
 ALL TREES:  
 CHAR. 61: 1 --> 0

NODE 47 :  
 ALL TREES:  
 CHAR. 48: 0 --> 1  
 CHAR. 51: 0 --> 1

NODE 48 :  
 ALL TREES:  
 CHAR. 20: 0 --> 1  
 CHAR. 21: 0 --> 1  
 CHAR. 22: 0 --> 1  
 CHAR. 35: 1 --> 0  
 CHAR. 38: 0 --> 1  
 SOME TREES:  
 CHAR. 2: 0 --> 1  
 CHAR. 13: 0 --> 1  
 CHAR. 29: 0 --> 1

NODE 49 :  
 ALL TREES:  
 CHAR. 25: 0 --> 1  
 CHAR. 34: 1 --> 0  
 CHAR. 37: 0 --> 1



CHAR. 41: 0 --> 1  
 CHAR. 56: 0 --> 1  
 CHAR. 61: 0 --> 1  
 CHAR. 64: 0 --> 1

NODE 50 :

ALL TREES:

CHAR. 42: 0 --> 1  
 CHAR. 52: 0 --> 1  
 CHAR. 53: 0 --> 1

NODE 51 :

ALL TREES:

CHAR. 3: 0 --> 1  
 CHAR. 18: 0 --> 1

SOME TREES:

CHAR. 23: 1 --> 2

NODE 52 :

ALL TREES:

CHAR. 9: 1 --> 2  
 CHAR. 20: 1 --> 2

NODE 53 :

ALL TREES:

CHAR. 7: 0 --> 1  
 CHAR. 8: 0 --> 1

NODE 54 :

ALL TREES:

CHAR. 27: 0 --> 1  
 CHAR. 29: 1 --> 2

NODE 55 :

ALL TREES:

CHAR. 0: 1 --> 0  
 CHAR. 6: 1 --> 2  
 CHAR. 14: 1 --> 2  
 CHAR. 17: 0 --> 1  
 CHAR. 19: 0 --> 1  
 CHAR. 24: 0 --> 1

SOME TREES:

CHAR. 23: 12 --> 1

TIME 0.04 SECS.
